# Supplementary material for: Transcriptome Analysis of Redox Systems and Polyamine Metabolic Pathway in Hepatoma and Non-Tumor Hepatocyte-like Cells
Source: MDPI journal article supplement (doi:10.3390/biom13040714), 2023-04-21
Supplement: s1 [file s1]

# SUPPLEMENTARY DATA

## Transcriptome Analysis of Redox Systems and Polyamine Metabolic Pathway in Hepatoma and Non-Tumor Hepatocyte-like Cells

Olga N. Ivanova <sup>1</sup>, George S. Krasnov <sup>1</sup>, Anastasiya V. Snezhkina <sup>1</sup>, Anna V. Kudryavtseva <sup>1</sup>, Vyacheslav S. Fedorov <sup>1</sup>, Natalia F. Zakirova <sup>1</sup>, Michail V. Golikov <sup>1</sup>, Sergey N. Kochetkov <sup>1</sup>, Birke Bartosch <sup>2</sup>, Vladimir T. Valuev-Elliston <sup>1</sup> and Alexander V. Ivanov <sup>1,\*</sup>

<sup>1</sup> Engelhardt Institute of Molecular Biology, Russian Academy of Sciences, 119991 Moscow, Russia

<sup>2</sup> Lyon Cancer Research Center, Université Claude Bernard Lyon 1, INSERM U1052, CNRS 5286, 69008 Lyon, France

\* Correspondence: aivanov@yandex.ru

**Table S1.** Oligonucleotides used in real-time PCR.

| Gene    | Orientation | Sequence (5'-3')           |
|---------|-------------|----------------------------|
| NOX1    | Sense       | CAATCTCTCTCCTGGAATGGCATCCT |
|         | Antisense   | CCTGCTGCTCGGATATGAATGGAGAA |
| NOX4    | Sense       | CTGGTGAATGCCCTCAACTT       |
|         | Antisense   | GGCCAGGAACAGTTGTGAAG       |
| DUOX2   | Sense       | TGGTCATTCTCCTCCACCTC       |
|         | Antisense   | GCTCCCCAGAGGATAAGTC        |
| CYP2E1  | Sense       | TTTAAGCCAGAACACTTCC        |
|         | Antisense   | GCACACAACAAAAGAAACA        |
| SOD2    | Sense       | GCTGACGGCTGCATCTGTTGGT     |
|         | Antisense   | AGGCCTGTTGTTCTTGCAGTGG     |
| NFE2L2  | Sense       | TACTCCCAGGTTGCCCACA        |
|         | Antisense   | CATCTACAAACGGGAATGTCTGC    |
| HMOX1   | Sense       | CCAGCAACAAAGTGCAAGATTC     |
|         | Antisense   | TCACATGGCATAAAGCCCTACAG    |
| NQO1    | Sense       | CCGTGGATCCCTTGCAAGAG       |
|         | Antisense   | AGGACCCTTCCGGAGTAAGA       |
| GCLC    | Sense       | GGATTTGGAAATGGGCAATTG      |
|         | Antisense   | CTCAGATATACTGCAGGCTTGGA    |
| SRM     | Sense       | CCCGCCGAAAGTCTCTTCAA       |
|         | Antisense   | GGAAGTTCGTGCTCGGGTTC       |
| AGMAT   | Sense       | ACATAGCATCTCAAACAGCAGGTTAG |
|         | Antisense   | AAGTTTCACCACCGTATGATCTTTC  |
| SAT1    | Sense       | ATCTAAGCCAGGTTGCAATGA      |
|         | Antisense   | GCACTCCTCACTCCTCTGTTG      |
| ARG1    | Sense       | TGATGTGAAGGATTATGGGGac     |
|         | Antisense   | TGGTTGTCAGTGGAGTGTG        |
| ASS1    | Sense       | CAACACCCCTGACATTCTCG       |
|         | Antisense   | ACTTTCCTTCCACTCGCTC        |
| ASL     | Sense       | TCCCAGCACCTACAACAAAGA      |
|         | Antisense   | TAGTCCCACACGCAGATCACG      |
| ALDH4A1 | Sense       | CCATCTCGCCCTTTAACTTCAC     |
|         | Antisense   | ACTGGGCTTCCATAGGACCA       |

|        |           |                          |
|--------|-----------|--------------------------|
| P5CR1  | Sense     | ACACCCCACAACAAGGAGAC     |
|        | Antisense | CTGGAGTGTGGTCATGCAG      |
| PRODH1 | Sense     | CAACGCCATGTACCACAGGT     |
|        | Antisense | ATGCCTAGCAGCTGTCCAAA     |
| ORAI3  | Sense     | GTACCGGGAGTTCGTGCA       |
|        | Antisense | GGTACTCGTGGTCACTCT       |
| STIM1  | Sense     | CAGAGTCTGCATGACCTTCA     |
|        | Antisense | GCTTCCTGCTTAGCAAGGTT     |
| GUS    | Sense     | CGTGGTTGGAGAGCTCATTTGGAA |
|        | Antisense | ATTCCCCAGCACTCTCGTCGGT   |

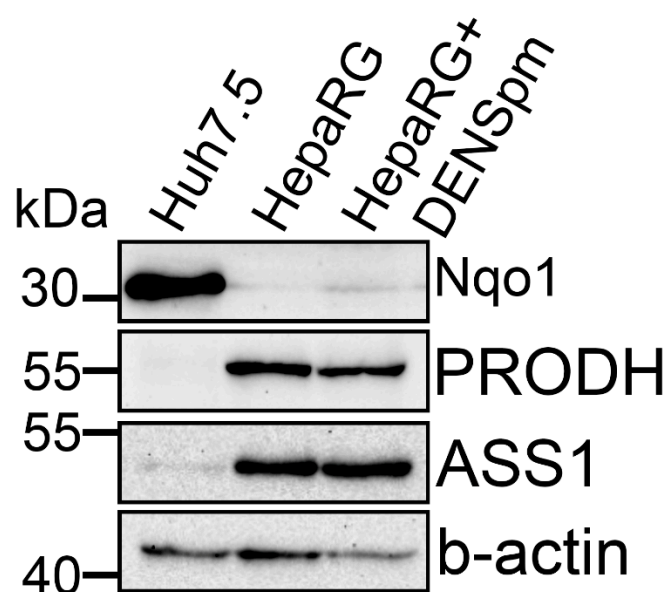

**Figure S1.** Expression of NAD(P)H:quinone oxidoreductase (Nqo1), proline dehydrogenase (PRODH) and argininosuccinate synthase (ASS1) in hepatoma Huh7.5 cells, hepatocyte-like HepaRG cells and in HepaRG cells treated with DENSpM, assessed by western blot analysis. As a housekeeping gene,  $\beta$ -actin was chosen.
